# Supplementary material for: Investigation of the Real-Time Release of Doxycycline from PLA-Based Nanofibers
Source: MDPI journal article supplement (doi:10.3390/jfb14060331), 2023-06-20
Supplement: s1 [file s1]

# Investigation of the Real-Time Release of Doxycycline from PLA-Based Nanofibers

Noémi-Izabella Farkas <sup>1</sup>, Laura Marincas <sup>2</sup>, Lucian Barbu-Tudoran <sup>3,4</sup>, Réka Barabás <sup>5,\*</sup>  
and Graziella Liana Turdean <sup>1,\*</sup>

<sup>1</sup> Department of Chemical Engineering, Faculty of Chemistry and Chemical Engineering, Babeş-Bolyai University, 11 Arany János Street, 400028 Cluj-Napoca, Romania; noemi.farkas@ubbcluj.ro

<sup>2</sup> Department of Chemistry, Faculty of Chemistry and Chemical Engineering, Babeş-Bolyai University, 11 Arany János Street, 400028 Cluj-Napoca, Romania; laura.marincas@ubbcluj.ro

<sup>3</sup> Department of Molecular Biology and Biotechnology, Faculty of Biology and Geology, Babeş-Bolyai University, 1 Mihail Kogălniceanu Street, 400084 Cluj-Napoca, Romania; lucian.barbu@ubbcluj.ro

<sup>4</sup> National Institute for Research and Development of Isotopic and Molecular Technologies, 67-103 Donath Street, 400293 Cluj-Napoca, Romania

<sup>5</sup> Department of Chemistry and Chemical Engineering of Hungarian Line of Study, Faculty of Chemistry and Chemical Engineering, Babeş-Bolyai University, 11 Arany János Street, 400028 Cluj-Napoca, Romania

\* Correspondence: reka.barabas@ubbcluj.ro (R.B.); graziella.turdean@ubbcluj.ro (G.L.T.); Tel.: +40-264-593833 (R.B.)

**Table S1.** Pharmacokinetic parameters for Doxy release by Zero-order, Higuchi, First-order, and Hixson-Crowell models obtained by DPV and UV measurements.

| Samples         | Zero-order          |                |                     |                | Higuchi            |                |                 |                |
|-----------------|---------------------|----------------|---------------------|----------------|--------------------|----------------|-----------------|----------------|
|                 | DPV                 |                | UV                  |                | DPV                |                | UV              |                |
|                 | k <sub>0</sub>      | R <sup>2</sup> | k <sub>0</sub>      | R <sup>2</sup> | k <sub>H</sub>     | R <sup>2</sup> | k <sub>H</sub>  | k <sub>H</sub> |
| PLA_Doxy_3      | 0.0143              | 0.876          | 0.0084              | 0.919          | 0.3471             | 0.92           | 0.185           | 0.185          |
| PLA_Doxy_7      | 0.0096              | 0.615          | 0.0136              | 0.666          | 0.2542             | 0.791          | 0.3517          | 0.3517         |
| PLA_Doxy_12     | 0.0066              | 0.929          | 0.0095              | 0.754          | 0.1595             | 0.98           | 0.2393          | 0.2393         |
| PLA/Hap_Doxy_3  | 0.0273              | 0.75           | 0.0142              | 0.749          | 0.696              | 0.896          | 0.3618          | 0.3618         |
| PLA/Hap_Doxy_7  | 0.0193              | 0.762          | 0.0175              | 0.933          | 0.491              | 0.906          | 0.4173          | 0.4173         |
| PLA/Hap_Doxy_12 | 0.0119              | 0.806          | 0.0066              | 0.644          | 0.297              | 0.928          | 0.1715          | 0.1715         |
|                 | First-order         |                |                     |                | Hixson-Crowell     |                |                 |                |
|                 | DPV                 |                | UV                  |                | DPV                |                | UV              |                |
|                 | k <sub>1</sub>      | R <sup>2</sup> | k <sub>1</sub>      | R <sup>2</sup> | k <sub>HC</sub>    | R <sup>2</sup> | k <sub>HC</sub> | R <sup>2</sup> |
| PLA_Doxy_3      | -7×10 <sup>-5</sup> | 0.881          | -4×10 <sup>-5</sup> | 0.919          | 2×10 <sup>-4</sup> | 0.879          | 0.0001          | 0.919          |
| PLA_Doxy_7      | -4×10 <sup>-5</sup> | 0.618          | -6×10 <sup>-5</sup> | 0.6727         | 2×10 <sup>-4</sup> | 0.617          | 0.0002          | 0.67           |
| PLA_Doxy_12     | -3×10 <sup>-5</sup> | 0.93           | -4×10 <sup>-5</sup> | 0.759          | 1×10 <sup>-4</sup> | 0.931          | 0.0002          | 0.757          |
| PLA/Hap_Doxy_3  | -1×10 <sup>-4</sup> | 0.761          | -7×10 <sup>-5</sup> | 0.758          | 5×10 <sup>-4</sup> | 0.758          | 0.0002          | 0.755          |
| PLA/Hap_Doxy_7  | -9×10 <sup>-5</sup> | 0.769          | -8×10 <sup>-5</sup> | 0.937          | 3×10 <sup>-4</sup> | 0.766          | 0.0003          | 0.936          |
| PLA/Hap_Doxy_12 | -5×10 <sup>-5</sup> | 0.762          | -3×10 <sup>-5</sup> | 0.646          | 2×10 <sup>-4</sup> | 0.808          | 0.0001          | 0.646          |

**Table S2.** The results of the analysis of variance (ANOVA) for the Doxy release investigated by DPV and UV measurements, and fitted by Zero-order, Higuchi, First-order, Hixson-Crowell, and Korsmeyer-Peppas kinetic models.

| Source of Variation                                                       | SS         | df | MS       | F        | P-value  | F <sub>crit</sub> |
|---------------------------------------------------------------------------|------------|----|----------|----------|----------|-------------------|
| <b>Anova: Single Factor in terms of R<sup>2</sup></b>                     |            |    |          |          |          |                   |
| Kinetic models 1-4                                                        | 0.096783   | 7  | 0.013826 | 1.248613 | 0.300095 | 2.249024          |
| Kinetic models 1-5                                                        | 0.223502   | 9  | 0.024834 | 2.500466 | 0.019061 | 2.073351          |
| <b>Anova: Two-Factor With Replication in terms of R<sup>2</sup></b>       |            |    |          |          |          |                   |
| Kinetic models 1-5                                                        | 0.20871512 | 4  | 0.052179 | 5.253823 | 0.001302 | 2.557179          |
| Investigation method DPV and UV                                           | 0.00903563 | 1  | 0.009036 | 0.909787 | 0.34476  | 4.03431           |
| Interactions between kinetic models and investigation methods             | 0.0057515  | 4  | 0.001438 | 0.144778 | 0.964478 | 2.557179          |
| <b>Anova: Single Factor in terms of kinetic constant, k</b>               |            |    |          |          |          |                   |
| Kinetic models 1-5                                                        | 80.38197   | 9  | 8.93133  | 7.145079 | 1.42E-06 | 2.073351          |
| <b>Anova: Two-Factor With Replication in terms of kinetic constant, k</b> |            |    |          |          |          |                   |
| Kinetic models 1-5                                                        | 78.6933    | 4  | 19.67332 | 15.73869 | 2.12E-08 | 2.557179          |
| Investigation method DPV and UV                                           | 0.257921   | 1  | 0.257921 | 0.206337 | 0.651619 | 4.03431           |
| Interactions between kinetic models and investigation methods             | 1.430755   | 4  | 0.357689 | 0.286152 | 0.885601 | 2.557179          |
